# Supplementary material for: Respiratory chain complex III deficiency due to mutated BCS1L: a novel phenotype with encephalomyopathy, partially phenocopied in a Bcs1l mutant mouse model
Source: PubMed Central journal article supplement (PMC5399415; doi:10.1186/s13023-017-0624-2), 2017-04-20

A

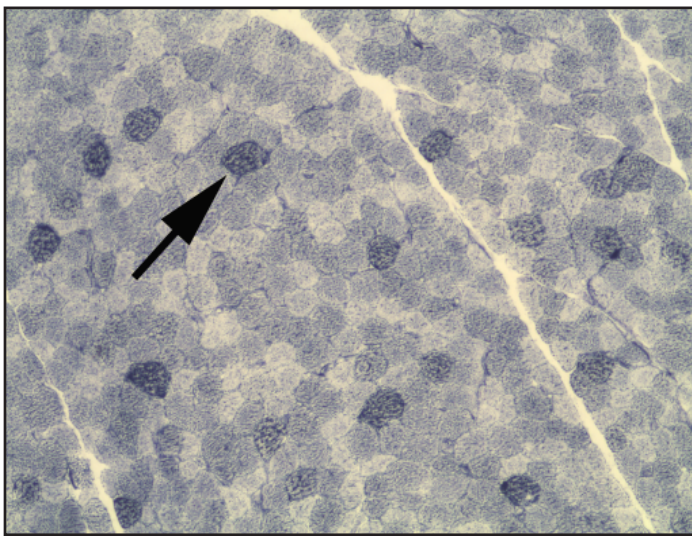

B

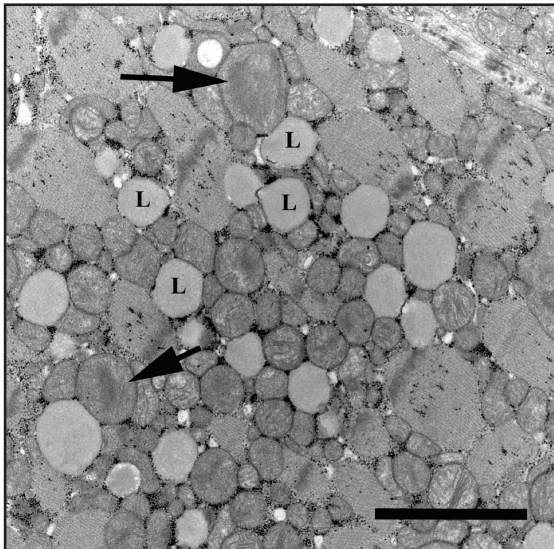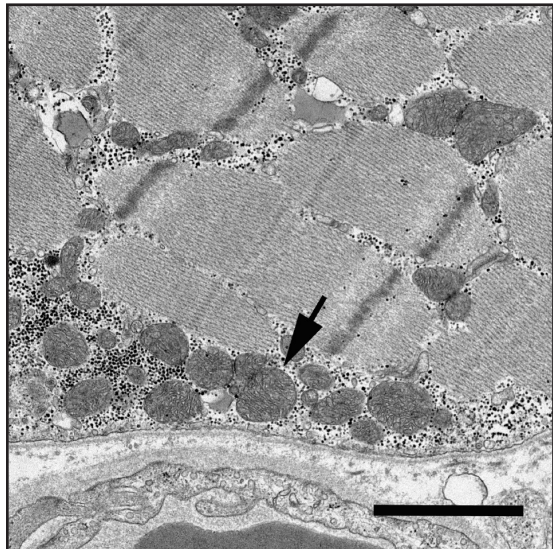

Supplement: 13023_2017_624_MOESM2_ESM.pdf [file 13023_2017_624_MOESM2_ESM.pdf]
